# Supplementary material for: Effect of Nb doping in WO3/ZrO2 catalysts on gas phase dehydration of glycerol to form acrolein
Source: Royal Society of Chemistry journal article supplement (doi:10.1039/c7ra08154e), 2017-01-01
Supplement: c7ra08154e1.pdf [file c7ra08154e1.pdf]

# **Effect of Nb doping in WO<sub>3</sub>/ZrO<sub>2</sub> catalysts on gas phase dehydration of glycerol to form acrolein**

**Ku-Hsiang Sung and Soofin Cheng\***

Department of Chemistry, *National Taiwan University*

*Roosevelt Rd. Sec. 4, Taipei 106, Taiwan. Fax: 886-2-33668671; E-mail:*

*chem1031@ntu.edu.tw*

## **Supporting Information**

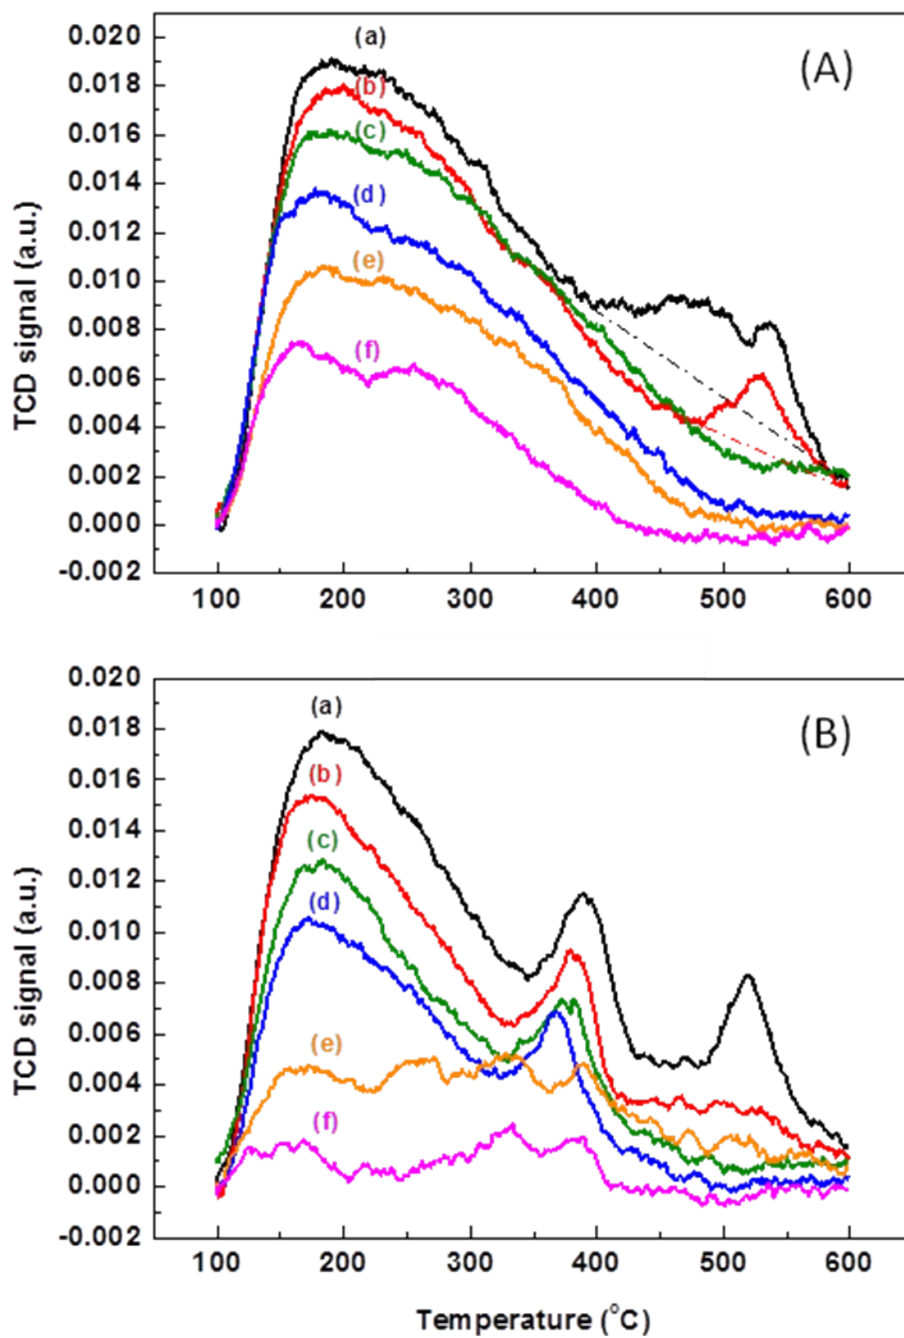

**Fig. S1** (A) NH<sub>3</sub>- and (B) CO<sub>2</sub>-TPD thermograms of WO<sub>3</sub>/ZrO<sub>2</sub> catalysts calcined at: (a) 400, (b) 450, (c) 500, (d) 600, (e) 700 and (f) 800°C.

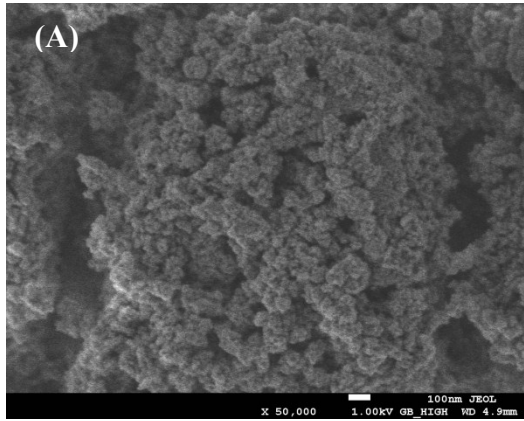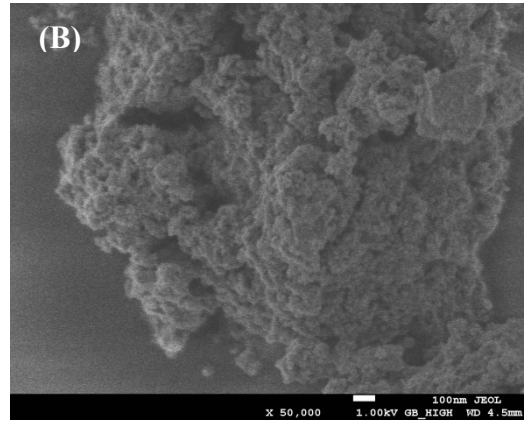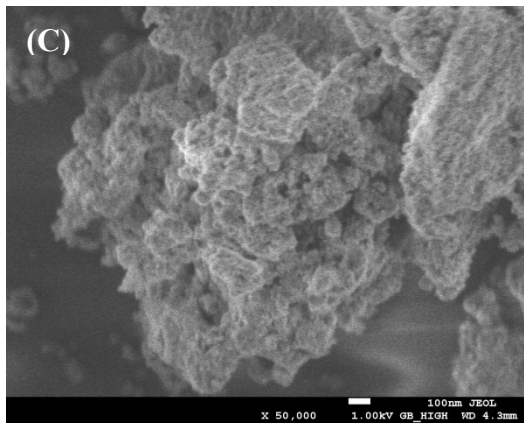

**Fig. S2** The SEM photographs of (A)  $\text{WO}_3/\text{ZrO}_2\text{-450}$  (B)  $1\%\text{NbWO}_x/\text{ZrO}_2\text{-450}$  and (C)  $3\%\text{NbWO}_x/\text{ZrO}_2\text{-450}$ .

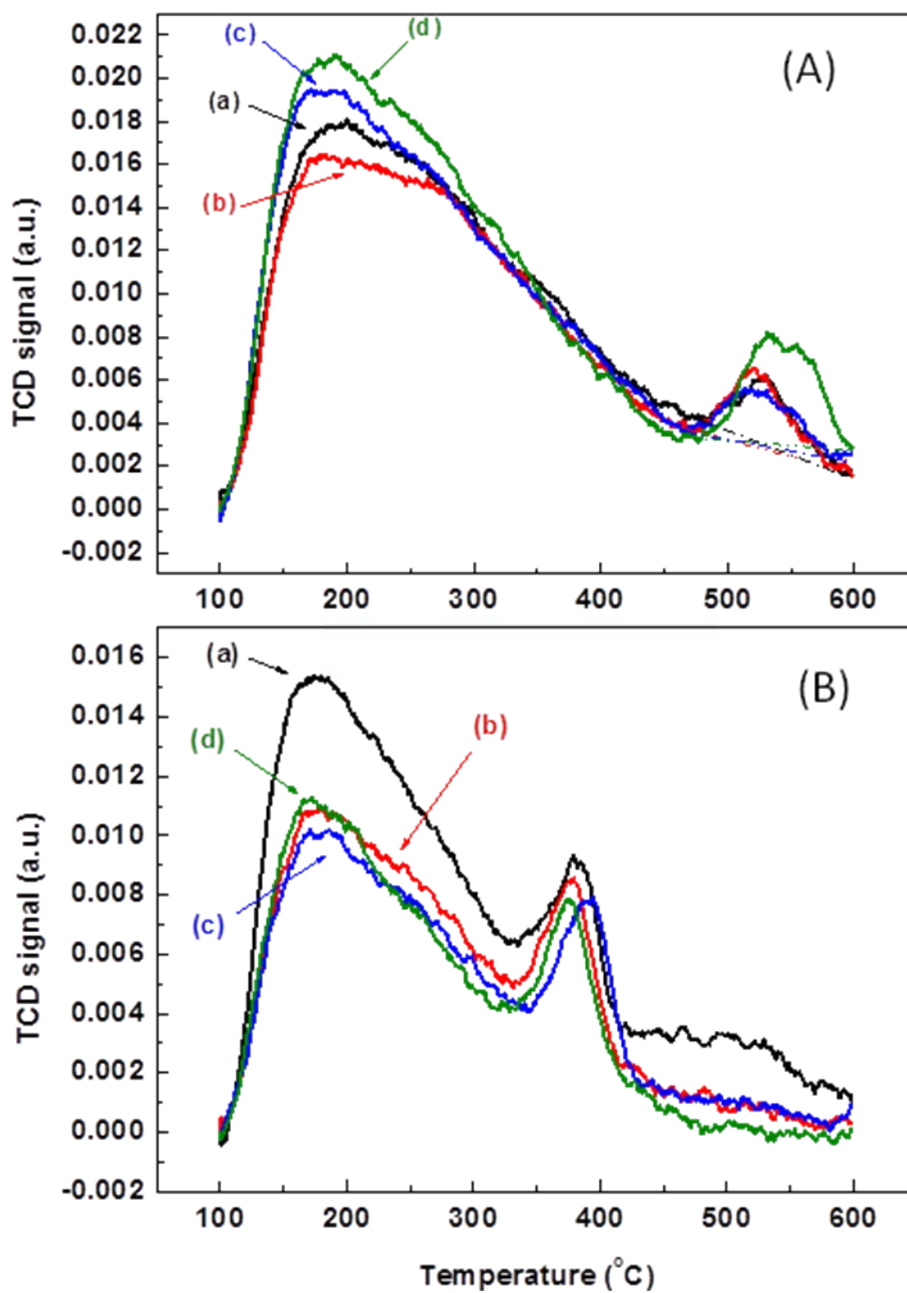

**Fig. S3** (A) NH<sub>3</sub>- and (B) CO<sub>2</sub>-TPD thermograms of (a) WO<sub>3</sub>/ZrO<sub>2</sub>-450, and those doped with (b) 1% Nb<sub>2</sub>O<sub>5</sub>, (c) 3% Nb<sub>2</sub>O<sub>5</sub>, and (d) 5% Nb<sub>2</sub>O<sub>5</sub>.

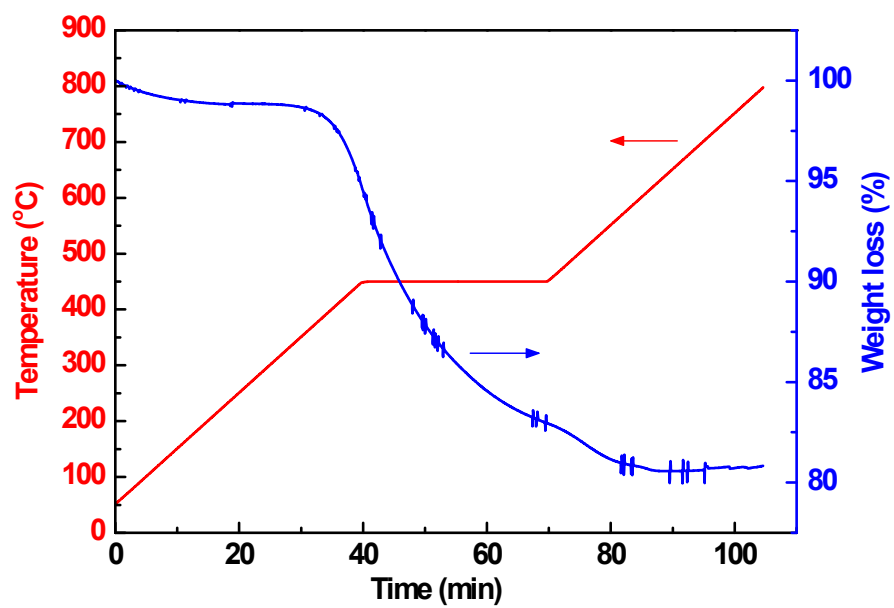

**Fig. S4** Thermogravimetric analysis of 3%NbWO<sub>x</sub>/ZrO<sub>2</sub>-450 under air after catalytic reaction.

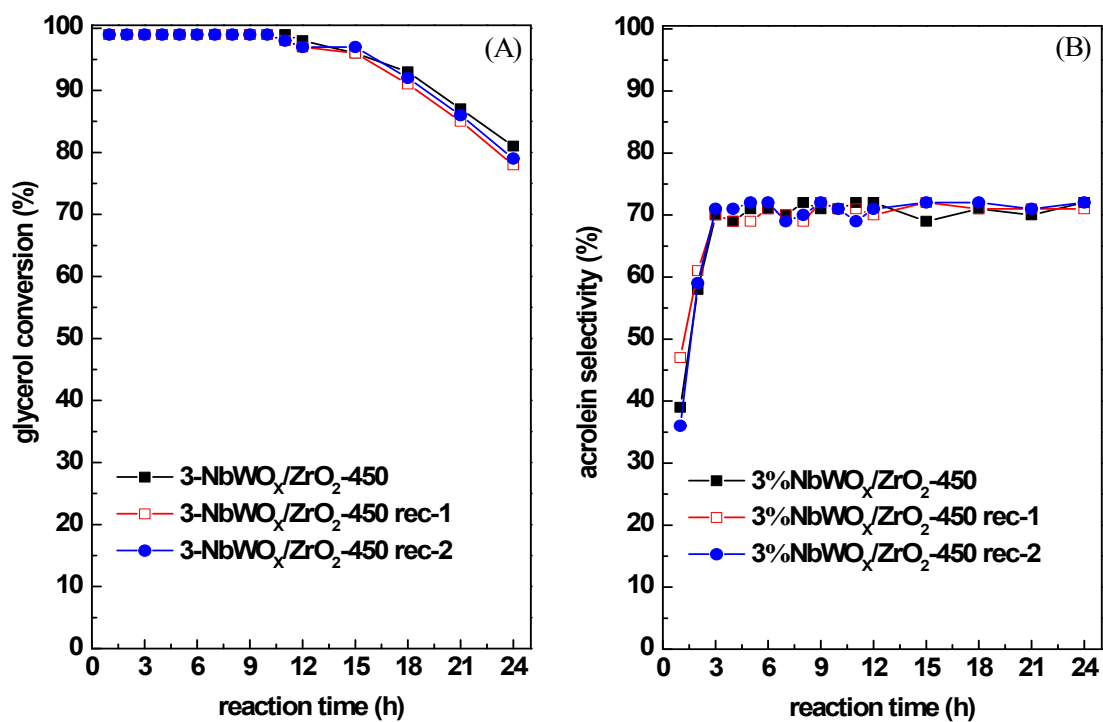

**Fig. S5** Evolution of (A) glycerol conversion and (B) selectivity to acrolein versus TOS at 290°C over fresh and regenerated 3%NbWO<sub>x</sub>/ZrO<sub>2</sub>-450 catalyst. 0.3 g catalyst, GHSV = 1117 h<sup>-1</sup>, 60 mL/min N<sub>2</sub> flow rate.

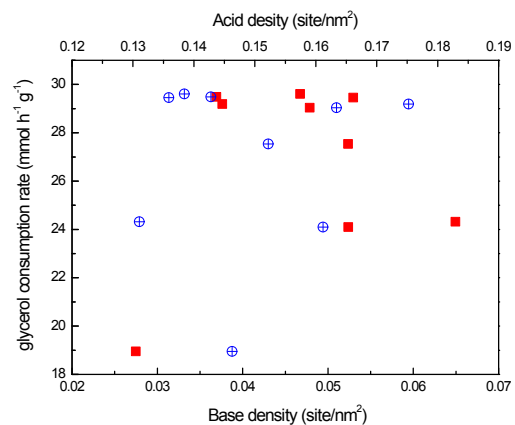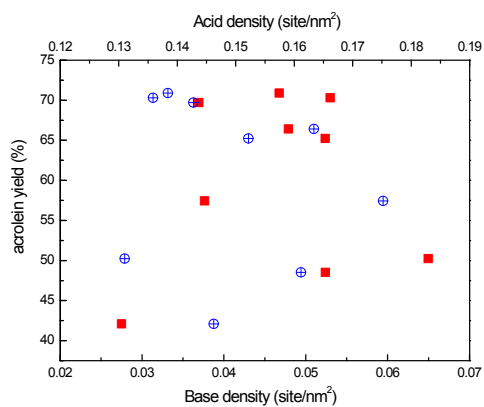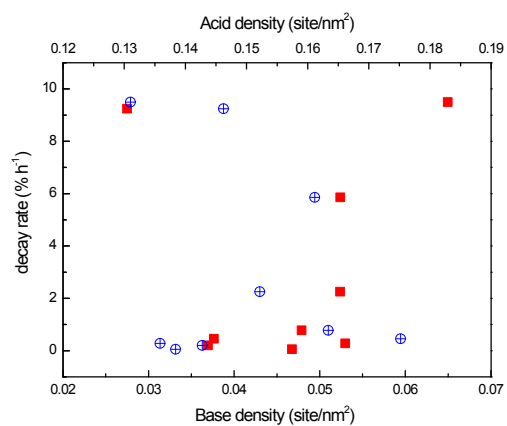

**Fig. S6** Correlations of (A) specific glycerol consumption rates (average in 3–12 h TOS), (B) acrolein yield, and (C) decay rate with acid (■) and base (⊕) densities on

WO<sub>3</sub>/ZrO<sub>2</sub> calcined at different temperatures and WO<sub>x</sub>/ZrO<sub>2</sub>-450 doped with 1–5% Nb<sub>2</sub>O<sub>5</sub>.
